# Supplementary material for: Nickel chelating functionalization of graphene composite for metal affinity membrane isolation of lysozyme
Source: Royal Society of Chemistry journal article supplement (doi:10.1039/c2tb00334a), 2012-11-30
Supplement: c2tb00334a.pdf [file c2tb00334a.pdf]

**Nickel chelating functionalization of graphene composite for metal  
affinity membrane isolation of lysozyme**

Jia-Wei Liu, Ting Yang, Shuai Chen, Xu-Wei Chen\*, Jian-Hua Wang\*  
Research Center for Analytical Sciences, College of Sciences, Box 332, Northeastern  
University, Shenyang 110819, China

**Electronic Supplementary Information (ESI)**

**Fig. S1.** Variations of zeta potentials of GO-PBA-IDA-Ni composite with the pH of solution media.

**Fig. S2.** The variations of Lys adsorption efficiencies with the ionic strength. Sample volume and flow rate: 500  $\mu\text{l}$ , 5  $\mu\text{l s}^{-1}$ ; the pH and concentration of protein sample solution: 7.0 in PBS buffer and 25  $\mu\text{g ml}^{-1}$ .

**Fig. S3.** Effect of ionic strength (A) and imidazole concentration (B) in stripping reagent on the recovery of Lys from GO-PBA-IDA-Ni composite film. Sample loading: 500  $\mu\text{l}$  of 25  $\mu\text{g ml}^{-1}$  Lys solution (pH 7.0 PBS) at the flow rate of 5  $\mu\text{l s}^{-1}$ ; elution: 0.02  $\text{mol l}^{-1}$  borate buffer containing 20  $\text{mmol l}^{-1}$  imidazole (A) or 1.0  $\text{mol l}^{-1}$  NaCl (B) with various concentration of NaCl (A) or imidazole (B) at the flow rate and volume of eluent were 5  $\mu\text{l s}^{-1}$  and 500  $\mu\text{l}$ , respectively.

**Fig. S4.** The effect of the flow rate on the adsorption (A) and desorption (B) processes. Sample loading: 500  $\mu\text{l}$  of 25  $\mu\text{g ml}^{-1}$  Lys solution (pH 7.0 PBS); elution: 0.02  $\text{mol l}^{-1}$  borate buffer containing 1  $\text{mol l}^{-1}$  NaCl and 20  $\text{mmol l}^{-1}$  imidazole with the volume of eluent: 500  $\mu\text{l}$ .

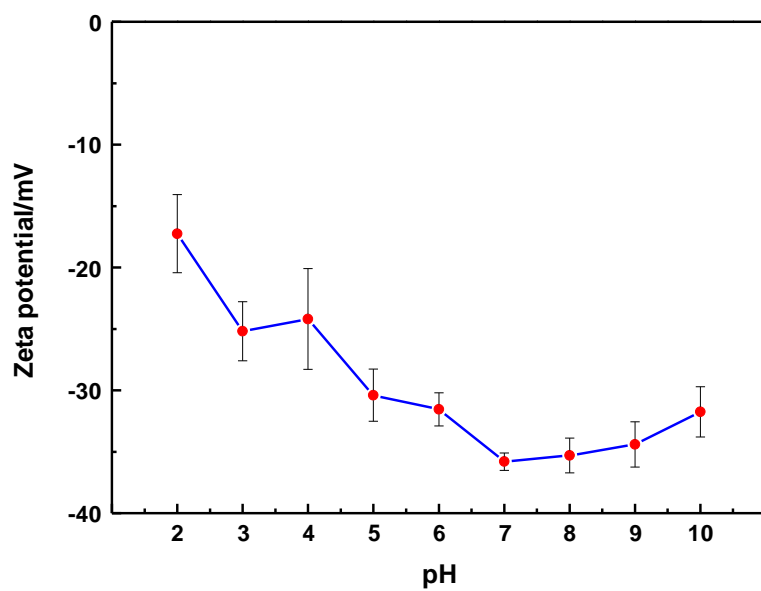

Figure S1

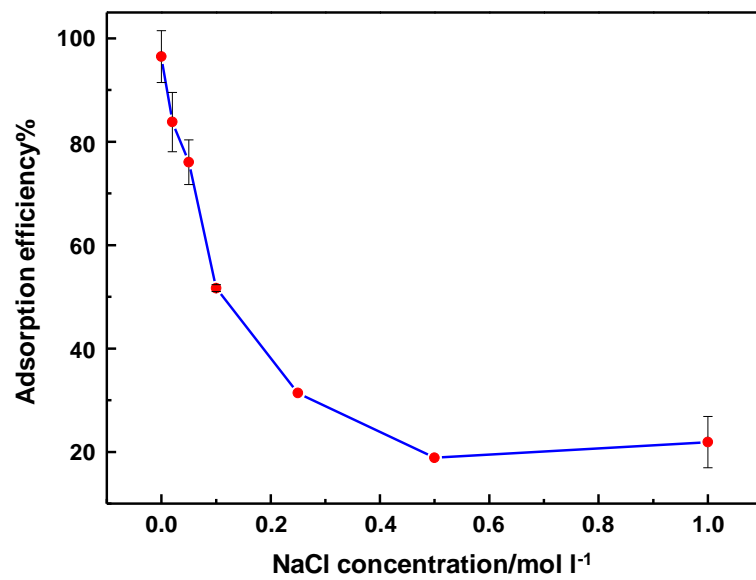

Figure S2

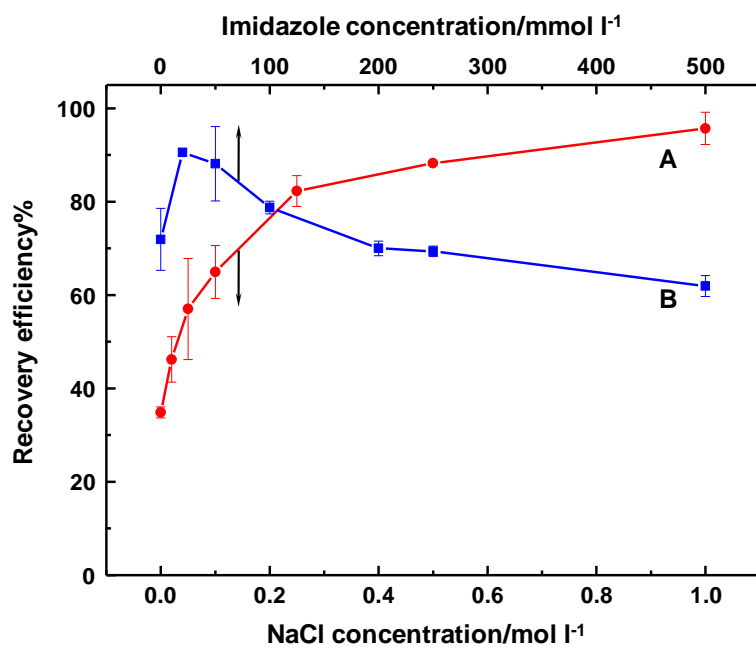

Figure S3

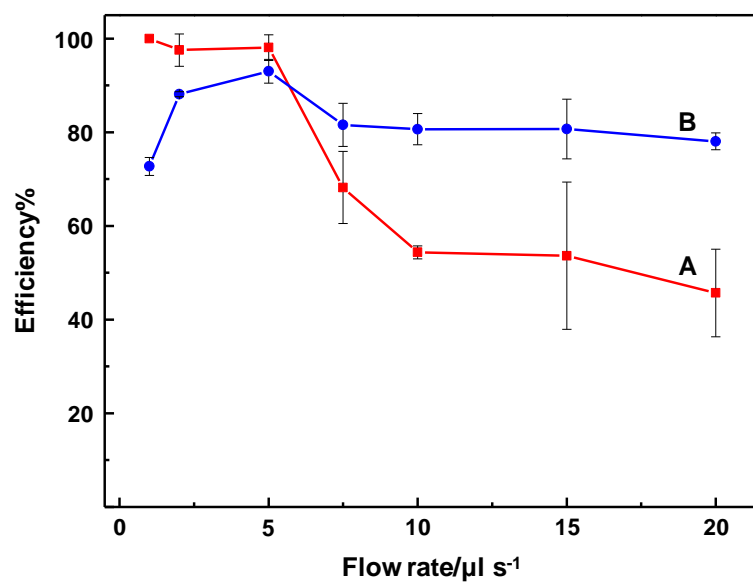

**Figure S4**
